# Supplementary material
Source: MDPI journal article supplement (https://www.mdpi.com/2079-6412/12/12/1970)
Supplement: s1 [file s1]

# Supplementary Materials: Geometric Tuning for Enhanced Moisture-Driven Electricity Generation Enabled by Graphene-Oxide Flakes

Katerina Anagnostou <sup>1,†</sup>, George Veisakis <sup>1,†</sup>, Ioannis Kalogerakis <sup>1</sup>, George Viskadourous <sup>1</sup>, Konstantinos Rogdakis <sup>1,2,\*</sup> and Emmanuel Kymakis <sup>1,2,\*</sup>

<sup>1</sup> Department of Electrical & Computer Engineering, Hellenic Mediterranean University (HMU), 71410 Heraklion, Greece

<sup>2</sup> Institute of Emerging Technologies (i-EMERGE) of HMU Research Center, 71410 Heraklion, Greece

\* Correspondence: krogdakis@hmu.gr (K.R.); kymakis@hmu.gr (E.K.)

† These authors contributed equally to this work.

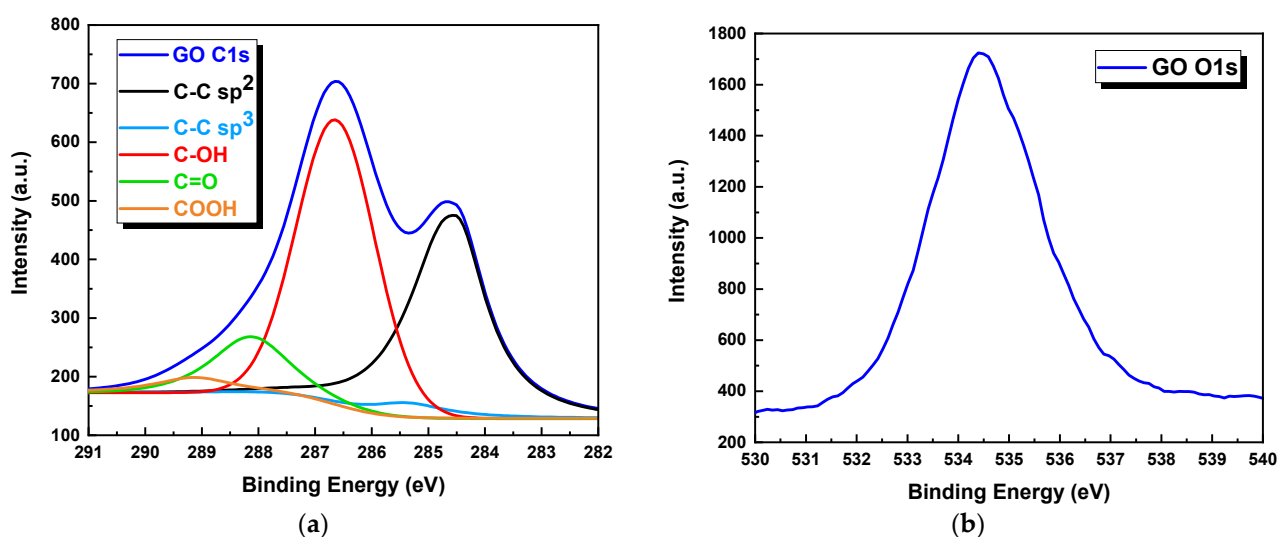

**Figure S1.** (a) Deconvoluted XPS C1s peak; and (b) XPS O1s peak of graphite oxide powder synthesised via improved Hummers' method.

From the overall Raman spectrum (Figure S2), it is evident that the as-prepared graphite oxide has a highly disordered structure due to the presence of many functional groups that are formed during the oxidation of graphite powder with the modified Hummers' method [43]. The Raman spectrum of the graphite oxide powder exhibits two prominent peaks at 1348 and 1594  $\text{cm}^{-1}$  which correspond to the D and G bands, respectively [31,32,44]. The G peak originates from the primary in-plane vibrational mode of the sp<sup>2</sup> carbon atoms and corresponds to the first-order scattering of the E<sub>2g</sub> phonon at the Brillouin zone centre [45–47]. The D peak derives from the breathing mode of A<sub>1g</sub> symmetry phonons around the K or K' points of the Brillouin zone and is activated only by defects within the graphene flakes, e.g., by the presence of oxygen functional groups and disruption of the sp<sup>2</sup>-hybridised carbon system [47,48]. The intensity of the D peak to the intensity of the G peak ratio ( $I_D/I_G$ ) is related to the number of defects present in a 2D material's structure [45]. The D band virtually has the same intensity as the G band which is indicative of structural disorder of the graphitic lattice [49]. Two lower intensity peaks appear at 2735 and 2929  $\text{cm}^{-1}$  and are attributed to the 2D and D + D' peaks, respectively [49–52]. The 2D band originates from a two-phonon double resonance Raman process and is related to the number of layers within the 2D material. [45,49,53]. A 2D peak that appears at >2700  $\text{cm}^{-1}$  is indicative of a multi-layer or bulk 2D sample [53]. The D + D' band requires defects for its activation [24].

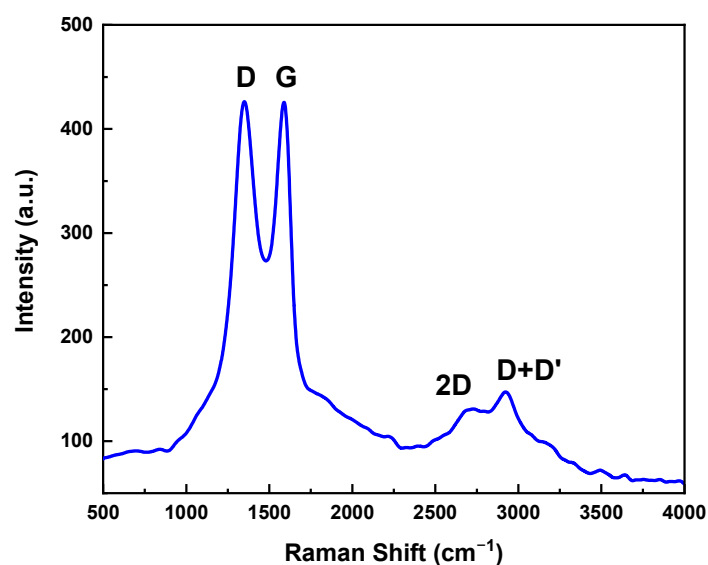

**Figure S2.** Raman spectrum of graphite oxide powder synthesised via improved Hummers' method.

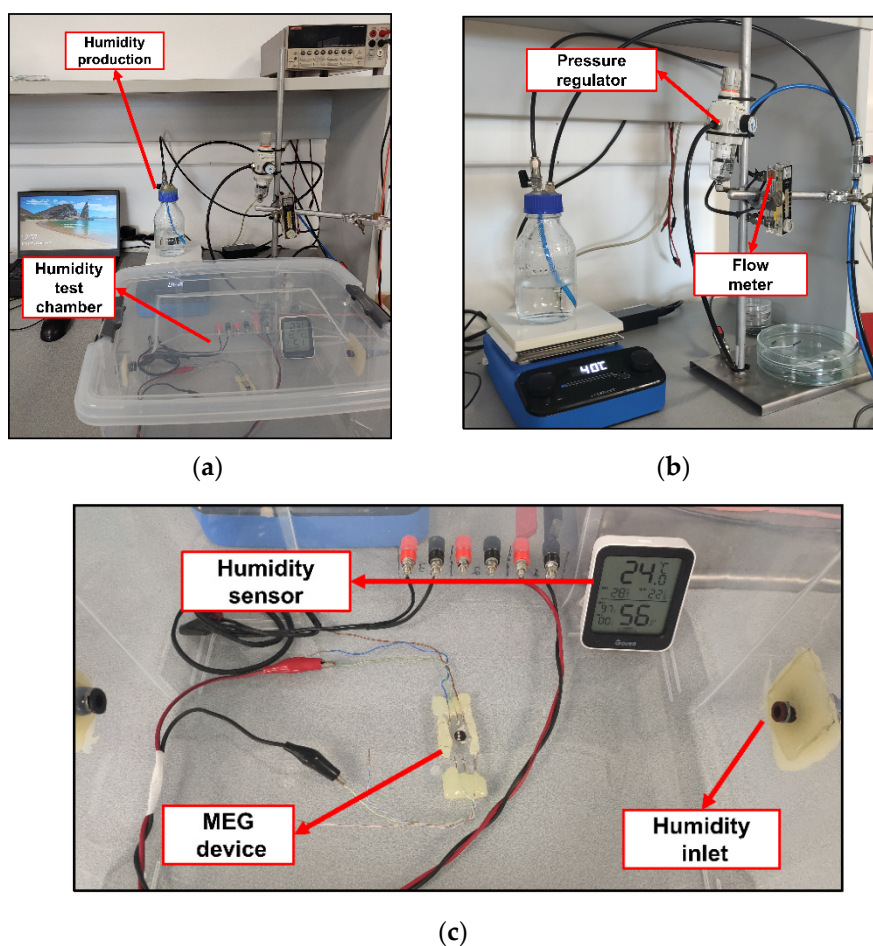

**Figure S3.** Digital photographs of custom experimental set-up built for moisture-induced voltage measurements (a) entire set-up which consists of the humidity test chamber, MEG device, humidity production and regulation components and data acquisition equipment; (b) humidity is produced by mildly heated water and regulated using a pressure regulator and a flow meter; (c) Close-up view of the interior of the test chamber.

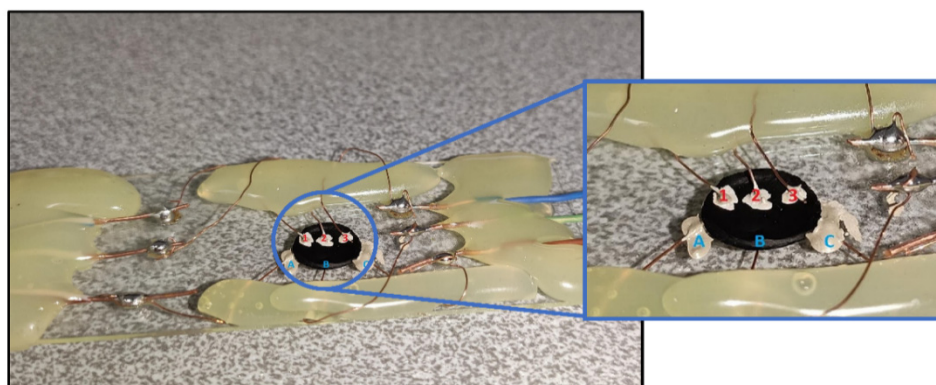

**Figure S4.** Digital photograph of fabricated GOP-1 device for evaluation of multiple contact configurations.

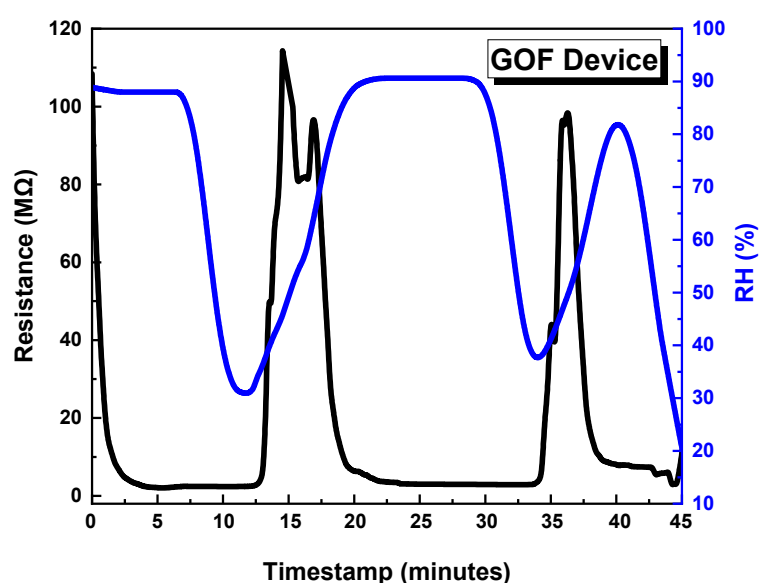

**Figure S5.** Resistance (MΩ) of GOP device as a function of RH (%).

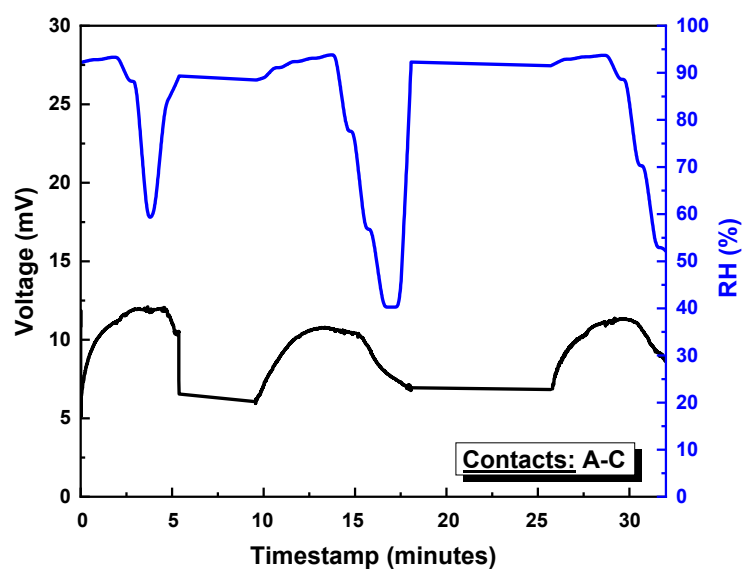

**Figure S6.** Voltage output as a function of RH when measuring contacts A-C of GOP-1 device. Since contacts A-C are practically concealed between the glass substrate and the GOP-1 sample, the bottom surface exposure to humidity is very limited, leading to suppressed  $V_o$  values.

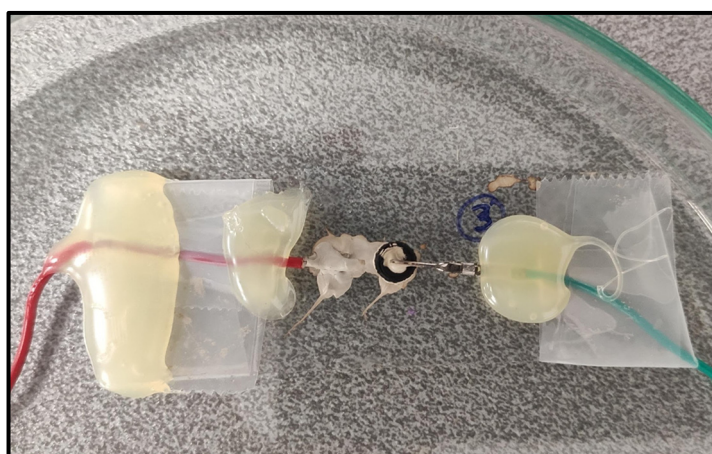

(a)

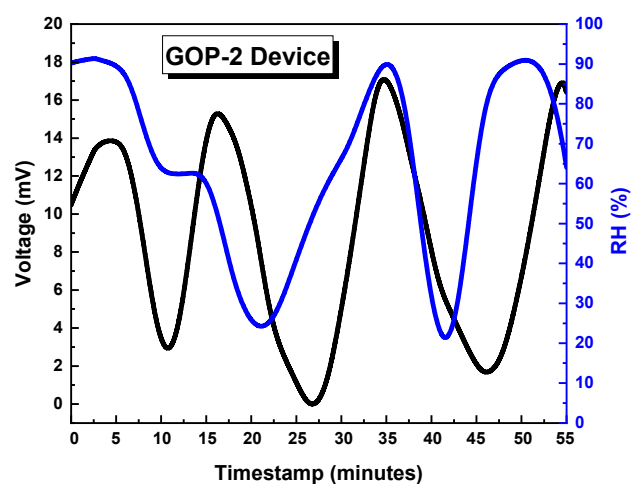

(b)

**Figure S7.** (a) Digital photograph of MEG device constructed using a GOP-2 as the moisture absorbing layer and large surface-area contacts in a vertical configuration (b) Moisture induced voltage ( $V_o$ ) generated by the pristine GOP-2 device, i.e. without  $V_o$  enhancement by performing multiple RH cycles or by applying a DC bias in high humidity environments.

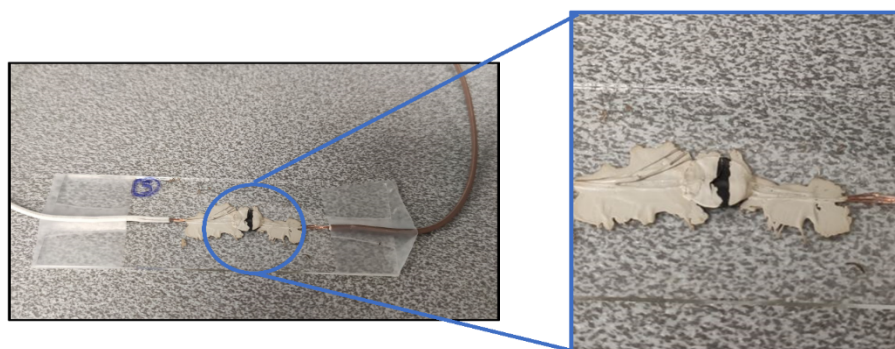

**Figure S8.** Digital photograph of MEG device constructed using GOF as the moisture absorbing layer and large surface area contacts in the horizontal configuration.
